# Supplementary material for: Liquefaction of Biomass and Upgrading of Bio-Oil: A Review
Source: PubMed Central journal article supplement (PMC6630481; doi:10.3390/molecules24122250), 2019-06-17
Supplement: molecules-24-02250-s001.pdf [file molecules-24-02250-s001.pdf]

**Table S1** Catalysts for hydrodeoxygenation

| Active site       | Support                                  | Temperature | Component         | Products  | Conversion | Ref.   |
|-------------------|------------------------------------------|-------------|-------------------|-----------|------------|--------|
| MoO <sub>3</sub>  | -                                        | 400         | Acetone           | Propylene | 96.8       | 65[1]  |
|                   |                                          |             | Cyclohexanone     | Pentenes  | 100        |        |
| MoC <sub>2</sub>  | -                                        | 360         | m-cresol          | Benzene   | 90         | 66[2]  |
| NiMo              | Al <sub>2</sub> O <sub>3</sub>           | 450         | Acetic acid       | Ethanol   | 65         | 67[3]  |
| Pt                | $\gamma$ -Al <sub>2</sub> O <sub>3</sub> | 300         | Guaiacol          | phenol    | -          | 72[4]  |
| Pt                | HBETA SiO <sub>2</sub>                   | 400         | Anisole           | benzene   | 90         | 73[5]  |
| Pt                | Al <sub>2</sub> O <sub>3</sub>           | 300         | Guaiacol          | Anisole   | 70         | 74[6]  |
| Pt                | $\gamma$ -Al <sub>2</sub> O <sub>3</sub> | 300         | m-cresol          | Toluene   | 74         | 78[7]  |
| Fe                | SiO <sub>2</sub>                         | 400         | Guaiacol          | Benzene   | 77         | 79[8]  |
| Fe                | SiO <sub>2</sub> , AB                    | 400         | Guaiacol          | Benzene   | 100        | 80[9]  |
| Ga                | HBETA SiO <sub>2</sub>                   | 400         | m-cresol          | toluene   | 80         | 82[10] |
| Ru                | TiO <sub>2</sub>                         | 400         | Pyrolysis vapors  |           |            | 83[11] |
| W                 | Carbon                                   | 380         | propanol/propanal | propene   | -          | 84[12] |
| Ni                | Al <sub>2</sub> O <sub>3</sub>           | 260         | 1-octanol         | Octenes   | 87.4       | 85[13] |
| Zn                | Al <sub>2</sub> O <sub>3</sub>           | 550         | Bio-oil           |           | Benzene    | 86[14] |
| Cu                | Carbon                                   | 250-450     | Guaiacol          | Toluene   | 65         | 87[15] |
| Ni <sub>2</sub> P | SiO <sub>2</sub>                         | 300         | Guaiacol          | Phenol    | 100        | 93[16] |

## References:

- [1]. T. Prasomsri, T. Nimmanwudipong, Y. Roman-Leshkov, Effective hydrodeoxygenation of biomass-derived oxygenates into unsaturated hydrocarbons by MoO<sub>3</sub> using low H<sub>2</sub> pressures, *Energy Environ. Sci.* 6 (6) (2013) 1732–1738.
- [2]. Chen, C., W. Lee and A. Bhan, Mo<sub>2</sub>C catalyzed vapor phase hydrodeoxygenation of lignin-derived phenolic compound mixtures to aromatics under ambient pressure. *Applied Catalysis A: General*, 2016. 510: p. 42-48.
- [3]. N. Joshi, A. Lawal, Hydrodeoxygenation of acetic acid in a microreactor, *Chem. Eng. Sci.* 84 (2012) 761–771
- [4]. Nimmanwudipong, T., et al., Catalytic Conversion of Guaiacol Catalyzed by Platinum Supported on Alumina: Reaction Network Including Hydrodeoxygenation Reactions. *Energy & Fuels*, 2011. 25(8): p. 3417-3427.
- [5]. Zhu, X., et al., Bifunctional transalkylation and hydrodeoxygenation of anisole over a Pt/HBeta catalyst. *Journal of Catalysis*, 2011. 281(1): p. 21-29.
- [6]. Nimmanwudipong, T., et al., Catalytic Reactions of Guaiacol: Reaction Network and Evidence of Oxygen Removal in Reactions with Hydrogen. *Catalysis Letters*, 2011. 141(6): p. 779-783.
- [7]. Zanuttini, M.S., et al., Deoxygenation of m-cresol on Pt/γ-Al<sub>2</sub>O<sub>3</sub> catalysts. *Catalysis Today*, 2013. 213: p. 9-17.
- [8]. Olcese, R.N., et al., Hydrodeoxygenation of Guaiacol, A Surrogate of Lignin Pyrolysis Vapors, Over Iron Based Catalysts: Kinetics and Modeling of the Lignin to Aromatics Integrated Process. *Energy & Fuels*, 2013. 27(2): p. 975-984.
- [9]. Olcese, R., et al., Gas-phase hydrodeoxygenation of guaiacol over iron-based catalysts. Effect of gases composition, iron load and supports (silica and activated carbon). *Applied Catalysis B: Environmental*, 2013. 129: p. 528-538.
- [10]. Ausavasukhi, A., et al., Hydrodeoxygenation of m-cresol over gallium-modified beta zeolite catalysts. *Journal of Catalysis*, 2012. 290: p. 90-100.
- [11]. Wan, S., et al., Direct catalytic upgrading of biomass pyrolysis vapors by a dual function Ru/TiO<sub>2</sub> catalyst. *AIChE Journal*, 2013. 59(7): p. 2275-2285.
- [12]. Ren, H., et al., Tungsten carbides as selective deoxygenation catalysts: experimental and computational studies of converting C<sub>3</sub> oxygenates to propene. *Green Chem*, 2014. 16(2): p. 761-769.
- [13]. Chandra Sekhar Palla, V., D. Shee and S.K. Maity, Kinetics of hydrodeoxygenation of octanol over supported nickel catalysts: a mechanistic study. *RSC Adv.*, 2014. 4(78): p. 41612-41621.
- [14]. S. Karnjanakom, A. Bayu, X. Hao, S. Kongparakul, C. Samart, A. Abudula, G. Guan, Selectively catalytic upgrading of bio-oil to aromatic hydrocarbons over Zn, Ce or Ni-doped mesoporous rod-like alumina catalysts, *J. Mol. Catal. A Chem.* 421(2016) 235–244,
- [15]. J. Sun, A.M. Karim, H. Zhang, L. Kovarik, X.S. Li, A.J. Hensley, J.S. McEwen, Y. Wang, Carbon-supported bimetallic Pd-Fe catalysts for vapor-phase hydrodeoxygenation

of guaiacol, *J. Catal.* 306 (2013) 47–57

[16] P. Bui, J.A. Cecilia, S.T. Oyama, A. Takagaki, A. Infantes-Molina, H. Zhao, D. Li, E. Rodríguez-Castellón, A. Jiménez López, Studies of the synthesis of transition metal phosphides and their activity in the hydrodeoxygenation of a biofuel model compound, *J. Catal.* 294 (2012) 184–198
